# Supplementary material for: Heterogeneous Expression of SDF1 Retains Actively Proliferating Neural Progenitors in the Capillary Compartment of the Niche
Source: PubMed Central journal article supplement — Stem Cell Reports. 2018 Dec 27;12(1):6–13. doi: 10.1016/j.stemcr.2018.11.022 (PMC6335601; doi:10.1016/j.stemcr.2018.11.022), 2018-12-27
Supplement: mmc1.pdf [file mmc1.pdf]

**Stem Cell Reports, Volume 12**

**Supplemental Information**

**Heterogeneous Expression of SDF1 Retains Actively Proliferating  
Neural Progenitors in the Capillary Compartment of the Niche**

**Chang Zhu, Swetha Mahesula, Sally Temple, and Erzsebet Kovacs**

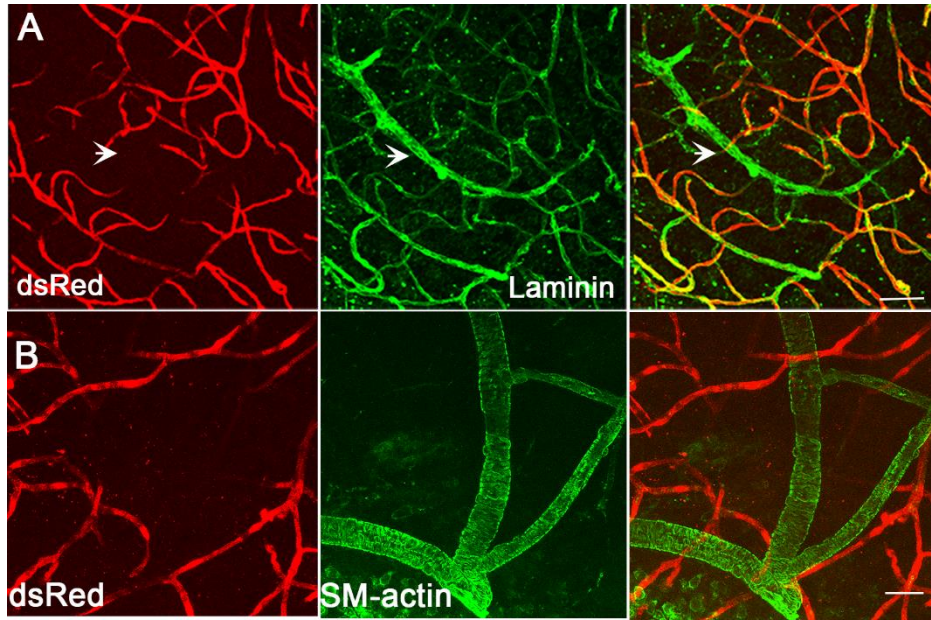

**Supplemental Figure 1. Related to Figure 1. DsRed is expressed on a subset of the vasculature.** (A) DsRed is absent from some blood vessels (arrow) immunostained for laminin. (B) DsRed is absent from smooth muscle actin positive arterioles. Scale bar = 50 $\mu$ m

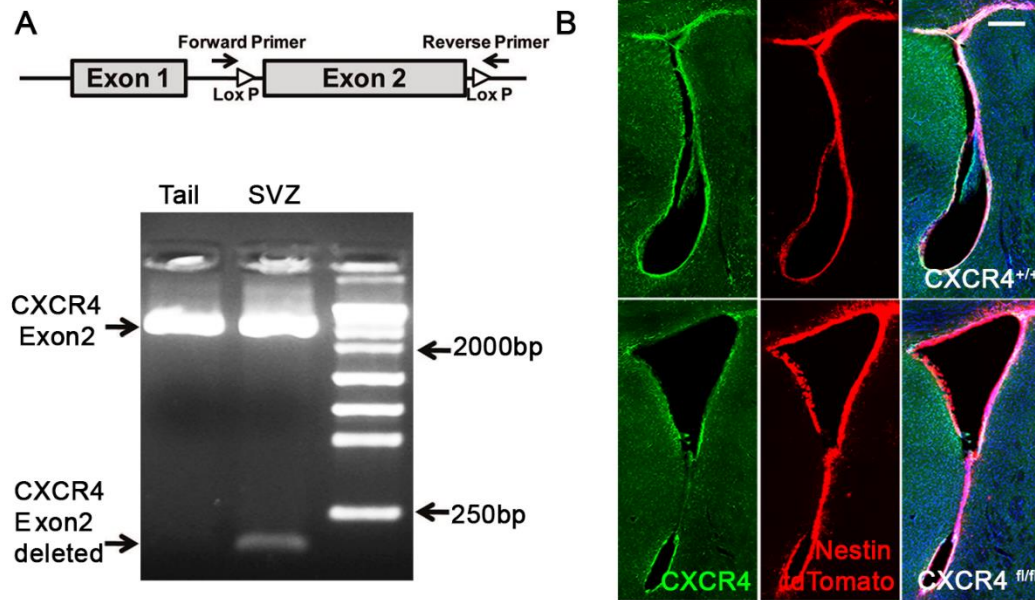

**Supplemental Figure 2. Related to Figure 3. Tamoxifen injection results in excision of CXCR4 and reduced expression in NSCs.** (A) Top panel: LoxP sites in the CXCR4 gene in the CXCR4<sup>fl/fl</sup> mice. Bottom panel: CXCR-deleted exon 2 is detectable after tamoxifen-induced recombination. (B) Immunohistochemistry for CXCR4 in the CXCR4<sup>fl/fl</sup> and CXCR4<sup>+/+</sup> V-SVZ. Scale bar = 1000 $\mu$ m.

## Supplemental Methods

### Primary Antibodies for Immunohistochemistry

GFAP rabbit polyclonal (Dako, catalog #Z0334, RRID: AB\_0013382, 1:500), goat anti-doublecortin (DCX, Santa Cruz Biotechnology, catalog #sc-8066, RRID:AB\_2088494, 1:200), mouse anti-MASH1 (BD Pharmingen, catalog #556604, RRID:AB\_396479, 1:100), rabbit anti-Laminin (Sigma, catalog #L9393, RRID: AB\_477163, 1:500), rat anti-CD31 (BD Pharmingen, catalog # 550274, RRID: AB\_393571, 1:100), rabbit anti-active Caspase-3 (Promega, catalog # G7481, RRID: AB\_430875, 1:250) rat anti-PDGF Receptor beta (Abcam, catalog #ab91066, RRID: AB\_10563302, 1:200) and rat anti-CXCR4 (1:25 R&D catalog # MAB21651).
